# Supplementary material for: Perception of the Preferred Reporting Items for Systematic Reviews and Meta-Analyses (PRISMA) statement of authors publishing reviews in nursing journals: a cross-sectional online survey
Source: PubMed Central journal article supplement — BMJ Open. 2019 Apr 20;9(4):e026271. doi: 10.1136/bmjopen-2018-026271 (PMC6500263; doi:10.1136/bmjopen-2018-026271), 2019-04-20
Supplement: bmjopen-2018-026271.reviewer_comments.pdf [file bmjopen-2018-026271.reviewer_comments.pdf]

## PEER REVIEW HISTORY

BMJ Open publishes all reviews undertaken for accepted manuscripts. Reviewers are asked to complete a checklist review form (<http://bmjopen.bmj.com/site/about/resources/checklist.pdf>) and are provided with free text boxes to elaborate on their assessment. These free text comments are reproduced below.

### ARTICLE DETAILS

|                            |                                                                                                                                                                                            |
|----------------------------|--------------------------------------------------------------------------------------------------------------------------------------------------------------------------------------------|
| <b>TITLE (PROVISIONAL)</b> | Perception of the Preferred Reporting Items for Systematic Reviews and Meta-Analyses (PRISMA) Statement of Authors Publishing Reviews in Nursing Journals: A Cross-Sectional Online Survey |
| <b>AUTHORS</b>             | Tam, Wilson; Tang, Arthur; Woo, Brigitte; Goh, Shawn                                                                                                                                       |

### VERSION 1 - REVIEW

|                        |                                                                                                        |
|------------------------|--------------------------------------------------------------------------------------------------------|
| <b>REVIEWER</b>        | Patrick Bossuyt<br>Amsterdam University Medical Centers<br>I am involved in the PRISMA update process. |
| <b>REVIEW RETURNED</b> | 16-Sep-2018                                                                                            |

|                         |                                                                                                                                                                                                                                                                                                                                                                                                                                                                                                                                                                                                                                                                                                                                                                                                                                                                                                                                                                                                                                                                                                                                                                                                                                                                                                                                                                                                                                                                                                                                                       |
|-------------------------|-------------------------------------------------------------------------------------------------------------------------------------------------------------------------------------------------------------------------------------------------------------------------------------------------------------------------------------------------------------------------------------------------------------------------------------------------------------------------------------------------------------------------------------------------------------------------------------------------------------------------------------------------------------------------------------------------------------------------------------------------------------------------------------------------------------------------------------------------------------------------------------------------------------------------------------------------------------------------------------------------------------------------------------------------------------------------------------------------------------------------------------------------------------------------------------------------------------------------------------------------------------------------------------------------------------------------------------------------------------------------------------------------------------------------------------------------------------------------------------------------------------------------------------------------------|
| <b>GENERAL COMMENTS</b> | <p>The authors have performed an e-survey among authors of systematic reviews published between 1 January 2011 and 15 December 2017 in 116 nursing journals. The response rate was very poor: 181 of 1960 contacted authors (9%) completed the questionnaire.</p> <p>I have a few questions and suggestions.</p> <p>1. Rationale.<br/>The introduction and the discussion do not fully explain why this study had to be done. Why was this questionnaire developed, and why ask authors in nursing journals about the perceived importance of these items? Please provide a rationale for performing this survey.</p> <p>2. Importance<br/>Following on the previous remark: why ask authors about the perceived importance of the item? Was "importance" defined or explained?<br/>BTW, all average importance scores are very high anyway. What are the implications of these findings? Please provide a discussion of the implications of these findings.<br/>I would have expected questions about ease of use, handling of PRISMA in writing or submitting the manuscript, experiences during peer review or discussions with the editors, etc.</p> <p>3. Sampling<br/>It is clear how the journals were identified, but why include reviews published between 2011 and 2017? Why start in 2011? (PRISMA was published in 2009) Please explain.<br/>Similar questions about the selection of articles. In understand 3,877 articles were found. Why not contact all authors? How was the selection of the articles and authors made? Random?</p> |
|-------------------------|-------------------------------------------------------------------------------------------------------------------------------------------------------------------------------------------------------------------------------------------------------------------------------------------------------------------------------------------------------------------------------------------------------------------------------------------------------------------------------------------------------------------------------------------------------------------------------------------------------------------------------------------------------------------------------------------------------------------------------------------------------------------------------------------------------------------------------------------------------------------------------------------------------------------------------------------------------------------------------------------------------------------------------------------------------------------------------------------------------------------------------------------------------------------------------------------------------------------------------------------------------------------------------------------------------------------------------------------------------------------------------------------------------------------------------------------------------------------------------------------------------------------------------------------------------|

|  |                                                                                                                                                                                                                                                                                                                                                                                                                                                                                                                                                                                                                                                                                                                                                                                                                                                                                                                                                                                                                                                                                                                        |
|--|------------------------------------------------------------------------------------------------------------------------------------------------------------------------------------------------------------------------------------------------------------------------------------------------------------------------------------------------------------------------------------------------------------------------------------------------------------------------------------------------------------------------------------------------------------------------------------------------------------------------------------------------------------------------------------------------------------------------------------------------------------------------------------------------------------------------------------------------------------------------------------------------------------------------------------------------------------------------------------------------------------------------------------------------------------------------------------------------------------------------|
|  | <p>The additional effort of identifying the remaining corresponding authors would have been limited.</p> <p>4. Testing<br/>The authors write that a “one-sample t-test was used to examine the differences between the overall and individual item rating”. But these are two ratings given by each respondent, so a paired sample t-test should have been used.</p> <p>5. Sample size justification<br/>The sample size justification is a bit strange. It is phrased in terms of the desired width of the 95%CI, but no CI are reported in the results. Please revise the calculations to match the analyses, or provide another form of justification.</p> <p>Other remarks</p> <p>6. Was there an algorithm for contacting a second or third person in case of incorrect addresses or bounced messages? (e.g. search for address of other authors).</p> <p>7. I would not call PRISMA the gold standard. Best known or preferred instrument would be a better term.</p> <p>8. The list of percentages in Table 2 does not always add to 100%.</p> <p>9. The list of references comes in two different formats.</p> |
|--|------------------------------------------------------------------------------------------------------------------------------------------------------------------------------------------------------------------------------------------------------------------------------------------------------------------------------------------------------------------------------------------------------------------------------------------------------------------------------------------------------------------------------------------------------------------------------------------------------------------------------------------------------------------------------------------------------------------------------------------------------------------------------------------------------------------------------------------------------------------------------------------------------------------------------------------------------------------------------------------------------------------------------------------------------------------------------------------------------------------------|

|                        |                                                                                                                                               |
|------------------------|-----------------------------------------------------------------------------------------------------------------------------------------------|
| <b>REVIEWER</b>        | <p>Matthew J Page<br/>Monash University<br/>I am leading the update of the 2009 PRISMA statement for systematic reviews and meta-analyses</p> |
| <b>REVIEW RETURNED</b> | 02-Nov-2018                                                                                                                                   |

|                         |                                                                                                                                                                                                                                                                                                                                                                                                                                                                                                                                                                                                                                                                                                                                                                                                                                                                                                                                                                                                                                                                                                                                                                                                                                                                                                                                                              |
|-------------------------|--------------------------------------------------------------------------------------------------------------------------------------------------------------------------------------------------------------------------------------------------------------------------------------------------------------------------------------------------------------------------------------------------------------------------------------------------------------------------------------------------------------------------------------------------------------------------------------------------------------------------------------------------------------------------------------------------------------------------------------------------------------------------------------------------------------------------------------------------------------------------------------------------------------------------------------------------------------------------------------------------------------------------------------------------------------------------------------------------------------------------------------------------------------------------------------------------------------------------------------------------------------------------------------------------------------------------------------------------------------|
| <b>GENERAL COMMENTS</b> | <p>The authors report the first (to my knowledge) study to examine review authors' views of the PRISMA statement for systematic reviews. The manuscript is very well written, the methodology employed is appropriate, and the authors draw appropriate conclusions. The results of the analysis of open-ended responses about each of the 27 items is very useful to those who develop or update reporting guidelines for systematic reviews. I have a few minor suggestions.</p> <p>Title: Please indicate in the title that only authors of reviews in nursing journals were surveyed, so that reader can determine the applicability of the study.</p> <p>Abstract: To enable readers to interpret the results, it would be helpful to indicate what the range and direction of the scales were in the questionnaire. For example, the authors state that “The overall importance of PRISMA was rated as 8.66”; is this a score on a scaling ranging from 0-10, or 1-9, or something else? And do high scores indicate “high” or “low” importance. Same with all other results presented.</p> <p>Introduction: I suggest that the findings of a recent scoping review of studies evaluating PRISMA be discussed (see <a href="https://www.ncbi.nlm.nih.gov/pubmed/29258593">https://www.ncbi.nlm.nih.gov/pubmed/29258593</a>; COI I led this review)</p> |
|-------------------------|--------------------------------------------------------------------------------------------------------------------------------------------------------------------------------------------------------------------------------------------------------------------------------------------------------------------------------------------------------------------------------------------------------------------------------------------------------------------------------------------------------------------------------------------------------------------------------------------------------------------------------------------------------------------------------------------------------------------------------------------------------------------------------------------------------------------------------------------------------------------------------------------------------------------------------------------------------------------------------------------------------------------------------------------------------------------------------------------------------------------------------------------------------------------------------------------------------------------------------------------------------------------------------------------------------------------------------------------------------------|

|  |                                                                                                                                                                                                                                                                                                                                                                                                                                                                                                                                                                                                                                                                                                                                                                                                                                                                                                                                                                                                                                                                                                                                                       |
|--|-------------------------------------------------------------------------------------------------------------------------------------------------------------------------------------------------------------------------------------------------------------------------------------------------------------------------------------------------------------------------------------------------------------------------------------------------------------------------------------------------------------------------------------------------------------------------------------------------------------------------------------------------------------------------------------------------------------------------------------------------------------------------------------------------------------------------------------------------------------------------------------------------------------------------------------------------------------------------------------------------------------------------------------------------------------------------------------------------------------------------------------------------------|
|  | <p>Methods – Participant sampling strategy: I think it is worth stating, “A search was conducted of the PubMed database for articles published between 1 January 2011 and 15 December 2017 with “review” or “meta-analysis” in the title of these 116 nursing journals”. This will help readers see easily that a specific systematic review search filter was not used to identify reviews.</p> <p>Methods – Sample size estimation: Please specify the anchors of the 1-10 scale, that is, what does 1 equal and what does 10 equal?</p> <p>Results: It is claimed that of the respondents to the survey, 160 (88.4%) had published systematic review(s)”. I am not sure why this percentage is not 100% given that authors were sampled because they had authored a systematic review or meta-analysis in one of the 116 journals.</p> <p>Discussion: Very clear and thoughtful consideration of the findings in the context of other research, limitations of the current study, and implications for practice and research.</p> <p>Table 3. It is not clear to me what the P-value reported has tested (i.e. what is it being compared to?).</p> |
|--|-------------------------------------------------------------------------------------------------------------------------------------------------------------------------------------------------------------------------------------------------------------------------------------------------------------------------------------------------------------------------------------------------------------------------------------------------------------------------------------------------------------------------------------------------------------------------------------------------------------------------------------------------------------------------------------------------------------------------------------------------------------------------------------------------------------------------------------------------------------------------------------------------------------------------------------------------------------------------------------------------------------------------------------------------------------------------------------------------------------------------------------------------------|

|                        |                                                |
|------------------------|------------------------------------------------|
| <b>REVIEWER</b>        | Mary Simons<br>Macquarie University, Australia |
| <b>REVIEW RETURNED</b> | 06-Nov-2018                                    |

|                         |                                                                                                                                                                                                                                                                                                                                                                                                                                                                                                                                                                                                                                                                                                                                                                                                                                                                                                                                                                                                                                                                                                                                                                                                                                                                                                                                                                                                                                                                                                                                                                                                    |
|-------------------------|----------------------------------------------------------------------------------------------------------------------------------------------------------------------------------------------------------------------------------------------------------------------------------------------------------------------------------------------------------------------------------------------------------------------------------------------------------------------------------------------------------------------------------------------------------------------------------------------------------------------------------------------------------------------------------------------------------------------------------------------------------------------------------------------------------------------------------------------------------------------------------------------------------------------------------------------------------------------------------------------------------------------------------------------------------------------------------------------------------------------------------------------------------------------------------------------------------------------------------------------------------------------------------------------------------------------------------------------------------------------------------------------------------------------------------------------------------------------------------------------------------------------------------------------------------------------------------------------------|
| <b>GENERAL COMMENTS</b> | <p>The Title should include "Systematic review authors", not "Review authors".</p> <p>Abstract: state what 8.66 is out of (10?) - this is a major finding and should be fully described in the Abstract.</p> <p>The PubMed search was not done correctly, leading to questionable results. According to Appendix 1 title words included were "review" or "meta-analysis". The filters "systematic review" or "meta-analysis" should have been used to screen for systematic reviews. The search documented in Appendix 1 will only retrieve review authors - not systematic review authors. This has implications for results - eg. page 12/44 - line 37. Only 88.4% of respondents had published a systematic review. Had the others published literature reviews?</p> <p>Reference missing - page 19/44 - line 6 – “only 3 out of the 116 nursing journals... endorsed the PRISMA Statement”. Where is the reference? Why such a low number?</p> <p>Also: page 7/44 - line 47. “177 academic journals have endorsed the PRISMA Statement”. Where is the reference for this statement? Are these nursing, medical or cross-disciplinary journals?</p> <p>Good discussion of why protocol registration is low. Why were there negative comments about using PICO in the search question? Could it be that respondents don't understand the purpose of creating a PICO-type question (ie: to clarify question and aid in developing search strategies)?</p> <p>There are grammatical errors throughout the manuscript.</p> <p>There are 2 reference lists. Remove the one that is not numbered.</p> |
|-------------------------|----------------------------------------------------------------------------------------------------------------------------------------------------------------------------------------------------------------------------------------------------------------------------------------------------------------------------------------------------------------------------------------------------------------------------------------------------------------------------------------------------------------------------------------------------------------------------------------------------------------------------------------------------------------------------------------------------------------------------------------------------------------------------------------------------------------------------------------------------------------------------------------------------------------------------------------------------------------------------------------------------------------------------------------------------------------------------------------------------------------------------------------------------------------------------------------------------------------------------------------------------------------------------------------------------------------------------------------------------------------------------------------------------------------------------------------------------------------------------------------------------------------------------------------------------------------------------------------------------|

## VERSION 1 – AUTHOR RESPONSE

Reviewer: 1

Reviewer Name: Patrick Bossuyt

Institution and Country: Amsterdam University Medical Centers

Please state any competing interests or state 'None declared': I am involved in the PRISMA update process.

Please leave your comments for the authors below

The authors have performed an e-survey among authors of systematic reviews published between 1 January 2011 and 15 December 2017 in 116 nursing journals. The response rate was very poor: 181 of 1960 contacted authors (9%) completed the questionnaire.

I have a few questions and suggestions.

### 1. Rationale.

1.1 The introduction and the discussion do not fully explain why this study had to be done. Why was this questionnaire developed, and why ask authors in nursing journals about the perceived importance of these items? Please provide a rationale for performing this survey.

### 2. Importance

1.2 Following on the previous remark: why ask authors about the perceived importance of the item? Was "importance" defined or explained?

Response: Previous studies had shown that the adherence of PRISMA statement for published systematic reviews was not high especially in nursing journals and hence it is interesting to examine the view of authors towards on the importance of the items in PRISMA statement. We have added these points in the introduction.

The results of this study would be useful for the guideline developers to revise or update the guideline and users of the guideline to have a better understanding of each items.

We focused on nursing journals because most authors of this manuscript are from nursing school. Also, the number of authors was expected to be a manageable size and hence we started the study through the authors in nursing journals which can be extended to authors in medical journals later.

In the questionnaire, the 27 items were directly extracted from the PRISMA statement and then respondents were asked to rate them individually in a 10-point likert scale (1 – Not important to 10 – Very important). We did not further elaborate the definition of importance as it is common to use likert scale to rate the importance of a statement/event/item.

1.3 BTW, all average importance scores are very high anyway. What are the implications of these findings? Please provide a discussion of the implications of these findings.

Response: In general, the mean scores of all but item 5 were over 8.0 implying that most of the respondents felt the items in PRISMA statement were important. We have added a few sentences to address this point in discussion.

I would have expected questions about ease of use, handling of PRISMA in writing or submitting the manuscript, experiences during peer review or discussions with the editors, etc.

Response: Thank you very much for the suggestion but we are sorry that we did not include such questions in the current survey and unable to re-ask the participants now. However, we will consider to add these questions if we conduct the survey for authors from medical journals in future.

### 3. Sampling

1.4 It is clear how the journals were identified, but why include reviews published between 2011 and 2017? Why start in 2011? (PRISMA was published in 2009) Please explain.

Response: We started from 2011 because the email addresses might not be valid when the time lag is long. We have added the explanation in the manuscript.

1.5 Similar questions about the selection of articles. In understand 3,877 articles were found. Why not contact all authors? How was the selection of the articles and authors made? Random?

The additional effort of identifying the remaining corresponding authors would have been limited.

Response: In fact, we tried to contact all authors whose email addresses were available in the records. As it is an electronic survey, we needed to capture the e-mail addresses from the record before we could send out the invitation. However, some records did not contain the authors' email addresses and hence cannot be used. We did not conduct manual search of the email addresses for the authors. We have added it as one of the limitations for the study.

### 4. Testing

1.6 The authors write that a "one-sample t-test was used to examine the differences between the overall and individual item rating". But these are two ratings given by each respondent, so a paired sample t-test should have been used.

Response: When we conducted the analysis, we computed the mean overall rating for the PRISMA among the participants first and used it as a global value towards PRISMA. Then, we compared individual rating of each item to this global value and hence one-sample t-test was used.

We agree that it is more appropriate to use paired sample t-test to compare the item rating and overall rating for each individual; hence all the p-values in Table 3 have been updated.

The conclusions remain the same.

### 5. Sample size justification

1.7 The sample size justification is a bit strange. It is phrased in terms of the desired width of the 95%CI, but no CI are reported in the results. Please revise the calculations to match the analyses, or provide another form of justification.

Response: We have added the 95% CI for the items in Table 3.

### Other remarks

1.8

6. Was there an algorithm for contacting a second or third person in case of incorrect addresses or bounced messages? (e.g. search for address of other authors).

Response: No, we did not find the email addresses manually. We have added it as one of the limitations for the study.

1.9

7. I would not call PRISMA the gold standard. Best known or preferred instrument would be a better term.

Response: We have revised the sentence to “For systematic reviews and meta-analyses of interventional studies, the Preferred Reporting Items for Systematic reviews and Meta-Analyses (PRISMA) statement [5] is the most commonly used reporting guidelines.”

1.10

8. The list of percentages in Table 2 does not always add to 100%.

Response: A few respondents did not fill that question, we have added it in Table 2.

1.11

9. The list of references comes in two different formats.

Response: We have removed the extra reference list.

===== End of reviewer 1 =====

Reviewer: 2

Reviewer Name: Matthew J Page

Institution and Country: Monash University

Please state any competing interests or state ‘None declared’: I am leading the update of the 2009 PRISMA statement for systematic reviews and meta-analyses

Please leave your comments for the authors below

The authors report the first (to my knowledge) study to examine review authors’ views of the PRISMA statement for systematic reviews. The manuscript is very well written, the methodology employed is appropriate, and the authors draw appropriate conclusions. The results of the analysis of open-ended responses about each of the 27 items is very useful to those who develop or update reporting guidelines for systematic reviews. I have a few minor suggestions.

2.1 Title: Please indicate in the title that only authors of reviews in nursing journals were surveyed, so that reader can determine the applicability of the study.

Response: We have revised the title as suggested.

2.2 Abstract: To enable readers to interpret the results, it would be helpful to indicate what the range and direction of the scales were in the questionnaire. For example, the authors state that “The overall importance of PRISMA was rated as 8.66”; is this a score on a scaling ranging from 0-10, or 1-9, or something else? And do high scores indicate “high” or “low” importance. Same with all other results presented.

Response: It is a score measured by 10 point-likert scale, we have added this in the “Questionnaire” sub-section and Table 2 and 3.

2.3 Introduction: I suggest that the findings of a recent scoping review of studies evaluating PRISMA be discussed (see <https://www.ncbi.nlm.nih.gov/pubmed/29258593>; COI I led this review)

Response: Thank you for the interesting paper, we have incorporated the findings of the paper in the introduction.

2.4 Methods – Participant sampling strategy: I think it is worth stating, “A search was conducted of the PubMed database for articles published between 1 January 2011 and 15 December 2017 with “review” or “meta-analysis” in the title of these 116 nursing journals”. This will help readers see easily that a specific systematic review search filter was not used to identify reviews.

Response: Thank you for the suggestion, we have replaced the suggested sentence in the manuscript.

2.5 Methods – Sample size estimation: Please specify the anchors of the 1-10 scale, that is, what does 1 equal and what does 10 equal?

Response: We have added this in the “Questionnaire” subsection.

2.6 Results: It is claimed that of the respondents to the survey, 160 (88.4%) had published systematic review(s)”. I am not sure why this percentage is not 100% given that authors were sampled because they had authored a systematic review or meta-analysis in one of the 116 journals.

Discussion: Very clear and thoughtful consideration of the findings in the context of other research, limitations of the current study, and implications for practice and research.

Response: Thank you for the positive comments

2.7 Table 3. It is not clear to me what the P-value reported has tested (i.e. what is it being compared to?).

Response: We have followed the suggestion from reviewer 1 to use paired sample t-test to examine the individual item rating to the global item rating of PRISMA. Description has been added in the method section.

===== End of reviewer 2 =====

Reviewer: 3

Reviewer Name: Mary Simons

Institution and Country: Macquarie University, Australia

Please state any competing interests or state ‘None declared’: None declared

Please leave your comments for the authors below

3.1 The Title should include "Systematic review authors", not "Review authors".

3.3 The PubMed search was not done correctly, leading to questionable results. According to Appendix 1 title words included were "review" or "meta-analysis". The filters "systematic review" or "meta-analysis" should have been used to screen for systematic reviews. The search documented in Appendix 1 will only retrieve review authors - not systematic review authors. This has implications for results - eg. page 12/44 - line 37. Only 88.4% of respondents had published a systematic review. Had the others published literature reviews?

Response: We did not only include systematic review authors but review authors. In fact, we intentionally used the word “review” in the search instead of “systematic review” because, we found in

our previous study that SR published in nursing journals may not use the word systematic review (Tam et al 2017), for example, it may be called “systematic literature review” but followed the approach of systematic review to conduct. Therefore, we started the search using “Review” or “Meta-analysis” to capture more relevant articles. In the questionnaire, we included a question to screen the respondents. For those, who were aware of PRISMA statement, would continue to fill the survey (i.e. 166 out of the 181).

The respondents might publish literature or other types of reviews (e.g. scoping, integrative, etc.).

Tam WWS\*, Lo KKH, Khalechelvan P, Seah J, Goh SYS. Is the information of systematic reviews published in nursing journals up-to-date? A cross-sectional study BMC Med Res Method 2017; 17: 151.

3.2 Abstract: state what 8.66 is out of (10?) - this is a major finding and should be fully described in the Abstract.

Response: We have added a sentence to describe it in the method section of the Abstract.

3.4 Reference missing - page 19/44 - line 6 – “only 3 out of the 116 nursing journals... endorsed the PRISMA Statement”. Where is the reference? Why such a low number?

Response: The information were extracted from <http://www.prisma-statement.org/> and we have added the link in the manuscript. We do not know the reason and just wanted to raise this issue in the manuscript. Please note that a lot of medical journals would require or recommend the authors to follow PRISMA to write their reviews but they may not formally make endorsement in the PRISMA organization.

3.5 Also: page 7/44 - line 47. “177 academic journals have endorsed the PRISMA Statement”. Where is the reference for this statement? Are these nursing, medical or cross-disciplinary journals?

Response: The information were extracted from <http://www.prisma-statement.org/> and we have added the link in the manuscript. Most are health-related journals.

3.6 Good discussion of why protocol registration is low. Why were there negative comments about using PICO in the search question? Could it be that respondents don't understand the purpose of creating a PICO-type question (ie: to clarify question and aid in developing search strategies)?

Response: We suspect that PICO was mainly developed for interventional studies or its variations can be for observational studies (like PECO). However, in nursing research, there may be other types of systematic reviews like SR of prevalence studies (Tung et al 2018), SR of psychological properties of instruments (Leung et al 2014), etc. Therefore, PICO may not be directly applicable in their case. We have added this part in the discussion.

References:

Tung YJ, Lo KKH, Ho R, Tam WWS. Prevalence of depression among nursing students: A systematic review and meta-analysis. Nurs Edu Today 2018; 63: 119-129.

Leung K. , Trevena L . & Waters D. (2014) Systematic review of instruments for measuring nurses' knowledge, skills and attitudes for evidence-based practice. Journal of Advanced Nursing 70(10), 2181–2195.

3.7 There are grammatical errors throughout the manuscript.

Response: We have sent the manuscript for a native English speaker to review again.



3.8 There are 2 reference lists. Remove the one that is not numbered.

Response: We are sorry for the mistake, one reference list has been removed.

===== End of reviewer 3 =====

#### VERSION 2 – REVIEW

|                        |                                                                      |
|------------------------|----------------------------------------------------------------------|
| <b>REVIEWER</b>        | Patrick Bossuyt<br>Amsterdam University Medical Centers, Netherlands |
| <b>REVIEW RETURNED</b> | 10-Jan-2019                                                          |

|                         |                                                                                                                                                                                                                                                                                                                                                                                                                                                                                                                                                                                                                                                                                                              |
|-------------------------|--------------------------------------------------------------------------------------------------------------------------------------------------------------------------------------------------------------------------------------------------------------------------------------------------------------------------------------------------------------------------------------------------------------------------------------------------------------------------------------------------------------------------------------------------------------------------------------------------------------------------------------------------------------------------------------------------------------|
| <b>GENERAL COMMENTS</b> | <p>I thank the authors for their careful response to the comments.</p> <p>A few items remain.</p> <p>Questionnaire<br/>Could you please include the actual questions in the manuscript?<br/>That would make it easier to appreciate the responses.</p> <p>Percentages<br/>Please use only two significant digits when reporting percentages (11% instead of 11.7%). That would make the manuscript easier to read.</p> <p>There are still some strange sentences, for example.</p> <p>Page 6 “are frequently served”<br/>Page 6 “it is a shared responsibility” (what is?)<br/>Page 8 “the perception of towards PRISMA”<br/>Page 10 “assume a low response rate” (assumed)</p> <p>Please correct these.</p> |
|-------------------------|--------------------------------------------------------------------------------------------------------------------------------------------------------------------------------------------------------------------------------------------------------------------------------------------------------------------------------------------------------------------------------------------------------------------------------------------------------------------------------------------------------------------------------------------------------------------------------------------------------------------------------------------------------------------------------------------------------------|

|                        |                                                                                                                                    |
|------------------------|------------------------------------------------------------------------------------------------------------------------------------|
| <b>REVIEWER</b>        | Matthew Page<br>Monash University<br>I am leading the update of the 2009 PRISMA statement for systematic reviews and meta-analyses |
| <b>REVIEW RETURNED</b> | 19-Dec-2018                                                                                                                        |

|                         |                     |
|-------------------------|---------------------|
| <b>GENERAL COMMENTS</b> | No further comments |
|-------------------------|---------------------|

|                        |                                               |
|------------------------|-----------------------------------------------|
| <b>REVIEWER</b>        | Mary Simons<br>Macquarie University Australia |
| <b>REVIEW RETURNED</b> | 31-Dec-2018                                   |

|                         |                                                                                                                                                                                                                                                                                                                                                                                                                        |
|-------------------------|------------------------------------------------------------------------------------------------------------------------------------------------------------------------------------------------------------------------------------------------------------------------------------------------------------------------------------------------------------------------------------------------------------------------|
| <b>GENERAL COMMENTS</b> | <p>An improved manuscript but needs attention in some areas. The manuscript requires further proof-reading as there are English grammar errors present, for example, the use of plurals is inconsistent, as well as use of past tense when needed.</p> <p>Introduction:<br/>The rationale in the introduction states: “Therefore, it is interesting to examine the perception of authors towards the importance of</p> |
|-------------------------|------------------------------------------------------------------------------------------------------------------------------------------------------------------------------------------------------------------------------------------------------------------------------------------------------------------------------------------------------------------------------------------------------------------------|

|  |                                                                                                                                                                                                                                                                                                                                                                                                                                                                                                                                                                                                                                                                                                                                                                                                                                                                                                                                                                                                                                                                                                                                                                                                                                                                                                                                                                                                                                                                                                                                                                                                                                                                                                                                                                                                                     |
|--|---------------------------------------------------------------------------------------------------------------------------------------------------------------------------------------------------------------------------------------------------------------------------------------------------------------------------------------------------------------------------------------------------------------------------------------------------------------------------------------------------------------------------------------------------------------------------------------------------------------------------------------------------------------------------------------------------------------------------------------------------------------------------------------------------------------------------------------------------------------------------------------------------------------------------------------------------------------------------------------------------------------------------------------------------------------------------------------------------------------------------------------------------------------------------------------------------------------------------------------------------------------------------------------------------------------------------------------------------------------------------------------------------------------------------------------------------------------------------------------------------------------------------------------------------------------------------------------------------------------------------------------------------------------------------------------------------------------------------------------------------------------------------------------------------------------------|
|  | <p>the items in PRISMA statement". I would suggest using a stronger term than "interesting". Perhaps you could consider using "important" or "compelling" for example.<br/>Page 7 (Introduction) , first line should read "Hepatology" not "Herpetology"</p> <p><b>Title and Methods</b><br/>The authors have decided to leave the term "review" in the title and study objective of the abstract ("The purpose of this study is to explore authors' perception on the PRISMA Statement from authors who published review and/or meta-analysis articles in nursing journals."). It may be useful to clarify the difference between a review (literature or narrative review) and a systematic review that ideally uses guidelines such as those outlined by PRISMA.<br/>The authors' rationale for using the term "review" in the title and search is confusing for those readers who understand the significant differences between a systematic review and a literature review. As previously suggested, if the authors used the correct systematic review filter in PubMed (ie Publication Type) then the relevant studies would be retrieved, despite the presence of the term "review" in the article title. I ran an identical search using the filters "Publication Type: Systematic review OR Publication Type: meta-analysis". After limiting to date range 2011 to 2017, I retrieved 1,780 records. Another way around this is to broaden the search and use "systematic review OR meta-analysis" in the title/abstract fields. You may consider these strategies for future studies.<br/>Methods: I am not clear on why and how you culled your total number of PubMed records from 3,877 to 1,832 articles? (page 12.)<br/>Good discussion of issues surrounding SR authors' attitudes towards PICO</p> |
|--|---------------------------------------------------------------------------------------------------------------------------------------------------------------------------------------------------------------------------------------------------------------------------------------------------------------------------------------------------------------------------------------------------------------------------------------------------------------------------------------------------------------------------------------------------------------------------------------------------------------------------------------------------------------------------------------------------------------------------------------------------------------------------------------------------------------------------------------------------------------------------------------------------------------------------------------------------------------------------------------------------------------------------------------------------------------------------------------------------------------------------------------------------------------------------------------------------------------------------------------------------------------------------------------------------------------------------------------------------------------------------------------------------------------------------------------------------------------------------------------------------------------------------------------------------------------------------------------------------------------------------------------------------------------------------------------------------------------------------------------------------------------------------------------------------------------------|

## VERSION 2 – AUTHOR RESPONSE

Reviewer: 3

Reviewer Name: Mary Simons

Institution and Country: Macquarie University Australia

Please state any competing interests or state 'None declared': None declared

Please leave your comments for the authors below

An improved manuscript but needs attention in some areas. The manuscript requires further proof-reading as there are English grammar errors present, for example, the use of plurals is inconsistent, as well as use of past tense when needed.

Response: We have sent the manuscript for professional editing company for editing.

Introduction:

The rationale in the introduction states: "Therefore, it is interesting to examine the perception of authors towards the importance of the items in PRISMA statement". I would suggest using a stronger term than "interesting". Perhaps you could consider using "important" or "compelling" for example.

Response: We have changed the word from “interesting” to “important”.

Page 7 (Introduction) , first line should read “Hepatology” not “Herpetology”

Response: We have changed the word to “Hepatology”.

#### Title and Methods

The authors have decided to leave the term “review” in the title and study objective of the abstract (“The purpose of this study is to explore authors’ perception on the PRISMA Statement from authors who published review and/or meta-analysis articles in nursing journals.”). It may be useful to clarify the difference between a review (literature or narrative review) and a systematic review that ideally uses guidelines such as those outlined by PRISMA.

Response: We have added a statement to highlight the difference between systematic review and literature/narrative review in Method section.

The authors’ rationale for using the term “review” in the title and search is confusing for those readers who understand the significant differences between a systematic review and a literature review. As previously suggested, if the authors used the correct systematic review filter in PubMed (ie Publication Type) then the relevant studies would be retrieved, despite the presence of the term “review” in the article title. I ran an identical search using the filters “Publication Type: Systematic review OR Publication Type: meta-analysis”. After limiting to date range 2011 to 2017, I retrieved 1,780 records. Another way around this is to broaden the search and use “systematic review OR meta-analysis” in the title/abstract fields. You may consider these strategies for future studies.

Response: Thank you very much for the suggestion, we totally understand your point. As it is a completed primary study, we are unable to change the sampling method but we will keep this in mind when we conduct further studies in the topics.

Methods: I am not clear on why and how you culled your total number of PubMed records from 3,877 to 1,832 articles? (page 12.)

Response: It was because many articles did not provide email addresses while some provided more than one email address). We revised the sentence to make this clearer.

Good discussion of issues surrounding SR authors’ attitudes towards PICO

Response: Thank you for your positive comment.

Reviewer: 1

Reviewer Name: Patrick Bossuyt

Institution and Country: Amsterdam University Medical Centers, Netherlands

Please state any competing interests or state ‘None declared’: None declared

Please leave your comments for the authors below

I thank the authors for their careful response to the comments.

Responses: Thank you for the positive comments.

A few items remain.

Questionnaire

Could you please include the actual questions in the manuscript?

That would make it easier to appreciate the responses.

Response: We have included the questionnaire as supplementary file.

Percentages

Please use only two significant digits when reporting percentages (11% instead of 11.7%). That would make the manuscript easier to read.

Response: We think it is better to keep at least one decimal place for the percentages and hence we did not make any changes for it.

There are still some strange sentences, for example.

Page 6 "are frequently served"

Page 6 "it is a shared responsibility" (what is?)

Page 8 "the perception of towards PRISMA"

Page 10 "assume a low response rate" (assumed)

Please correct these.

Response: We have made the changes and sent the manuscript for professional editing company for editing.

### VERSION 3 – REVIEW

|                        |                                     |
|------------------------|-------------------------------------|
| <b>REVIEWER</b>        | Mary Simons<br>Macquarie University |
| <b>REVIEW RETURNED</b> | 06-Feb-2019                         |

|                         |                                                                                                                                                                                                                                                                                                                                                                                                                                                                                                                                                                                                                                                                                                                                                                                                                                                                                                                                                                                                                                          |
|-------------------------|------------------------------------------------------------------------------------------------------------------------------------------------------------------------------------------------------------------------------------------------------------------------------------------------------------------------------------------------------------------------------------------------------------------------------------------------------------------------------------------------------------------------------------------------------------------------------------------------------------------------------------------------------------------------------------------------------------------------------------------------------------------------------------------------------------------------------------------------------------------------------------------------------------------------------------------------------------------------------------------------------------------------------------------|
| <b>GENERAL COMMENTS</b> | <p>A greatly improved manuscript. I have attached a copy of the last corrected draft with some suggested minor edits. I have used PDF editing tools - sticky notes and additional words added in red font. The only concern I have is the authors' use of the term "review authors" in the Title and throughout the manuscript. The authors state the difference between a systematic review and a narrative/literature review (pages 8-9). They should also state if they included in their study authors of both kinds of review as they refer to both systematic review authors and review authors throughout the manuscript. This makes the objective and Methods sections confusing and should be clarified for the reader. For example, in the Methods section, the Study Design part on page 8 refers to systematic review authors, but the Participants section directly below refers to review authors.</p> <p>The reviewer provided a marked copy with additional comments. Please contact the publisher for full details.</p> |
|-------------------------|------------------------------------------------------------------------------------------------------------------------------------------------------------------------------------------------------------------------------------------------------------------------------------------------------------------------------------------------------------------------------------------------------------------------------------------------------------------------------------------------------------------------------------------------------------------------------------------------------------------------------------------------------------------------------------------------------------------------------------------------------------------------------------------------------------------------------------------------------------------------------------------------------------------------------------------------------------------------------------------------------------------------------------------|

### VERSION 3 – AUTHOR RESPONSE

#### Responses to reviewer's comments

A greatly improved manuscript. I have attached a copy of the last corrected draft with some suggested minor edits. I have used PDF editing tools - sticky notes and additional words added in red font.

Response: Thank you very much for your help, we have revised based on your suggestions.

The only concern I have is the authors' use of the term "review authors" in the Title and throughout the manuscript. The authors state the difference between a systematic review and a narrative/literature review (pages 8-9). They should also state if they included in their study authors of both kinds of review as they refer to both systematic review authors and review authors throughout the manuscript. This makes the objective and Methods sections confusing and should be clarified for the reader. For example, in the Methods section, the Study Design part on page 8 refers to systematic review authors, but the Participants section directly below refers to review authors.

Response: We are sorry for the confusion. Based on our search strategy, we included the articles with the words "review" or "meta-analysis" in the titles and hence the respondents could be authors of narrative, systematic or other types of reviews. We have changed in our previous revision to a more generic term "review authors" instead of "systematic review authors". We noticed that we have missed the term in one sentence of the Study Design on page 8 and have since removed the word "systematic" in that sentence. I hope that this will enhance the clarity of the paper. Thank you for your comprehensive review of this article.

### VERSION 4 – REVIEW

|                        |                                                |
|------------------------|------------------------------------------------|
| <b>REVIEWER</b>        | Mary Simons<br>Macquarie University, Australia |
| <b>REVIEW RETURNED</b> | 12-Feb-2019                                    |

|                         |                            |
|-------------------------|----------------------------|
| <b>GENERAL COMMENTS</b> | The manuscript reads well. |
|-------------------------|----------------------------|
