# Supplementary material for: Perception of the Preferred Reporting Items for Systematic Reviews and Meta-Analyses (PRISMA) statement of authors publishing reviews in nursing journals: a cross-sectional online survey
Source: PubMed Central journal article supplement — BMJ Open. 2019 Apr 20;9(4):e026271. doi: 10.1136/bmjopen-2018-026271 (PMC6500263; doi:10.1136/bmjopen-2018-026271), 2019-04-20
Supplement: bmjopen-2018-026271supp001.pdf [file bmjopen-2018-026271supp001.pdf]

## Supplementary file 1: The search query used in PUBMED

((("Int J Nurs Stud"[Journal] OR "Eur J Cardiovasc Nurs"[Journal] OR "J Fam Nurs"[Journal] OR "Nurse Educ Today"[Journal] OR "J Nurs Scholarsh"[Journal] OR "Nurs Outlook"[Journal] OR "Women Birth"[Journal] OR "J Cardiovasc Nurs"[Journal] OR "Eur J Cancer Care (Engl)"[Journal] OR "Worldviews Evid Based Nurs"[Journal] OR "J Hum Lact"[Journal] OR "J Adv Nurs"[Journal] OR "Midwifery"[Journal] OR "Nurs Res"[Journal] OR "Aust Crit Care"[Journal] OR "J Nurs Manag"[Journal] OR "Am J Crit Care"[Journal] OR "Int J Ment Health Nurs"[Journal] OR "Eur J Oncol Nurs"[Journal] OR "Rehabil Nurs"[Journal] OR "Oncol Nurs Forum"[Journal] OR "Nurs Ethics"[Journal] OR "Res Nurs Health"[Journal] OR "Cancer Nurs"[Journal] OR "Am J Nurs"[Journal] OR "Heart Lung"[Journal] OR "Crit Care Nurse"[Journal] OR "Biol Res Nurs"[Journal] OR "Int Nurs Rev"[Journal] OR "J Midwifery Womens Health"[Journal] OR "Nurs Crit Care"[Journal] OR "J Pediatr Health Care"[Journal] OR "Collegian"[Journal] OR "J Nurs Adm"[Journal] OR "Appl Nurs Res"[Journal] OR "Nurse Educ"[Journal] OR "J Wound Ostomy Continence Nurs"[Journal] OR "Intensive Crit Care Nurs"[Journal] OR "J Assoc Nurses AIDS Care"[Journal] OR "Nurse Educ Pract"[Journal] OR "West J Nurs Res"[Journal] OR "Clin Nurs Res"[Journal] OR "Comput Inform Nurs"[Journal] OR "Int Emerg Nurs"[Journal] OR "Pain Manag Nurs"[Journal] OR "J Child Health Care"[Journal] OR "Adv Neonatal Care"[Journal] OR "Clin Simul Nurs"[Journal] OR "J Tissue Viability"[Journal] OR "J Transcult Nurs"[Journal] OR "J Obstet Gynecol Neonatal Nurs"[Journal] OR "Nurs Philos"[Journal] OR "J Nurs Care Qual"[Journal] OR "J Clin Nurs"[Journal] OR "Arch Psychiatr Nurs"[Journal] OR "Nurs Health Sci"[Journal] OR "J Pediatr Nurs"[Journal] OR "J Prof Nurs"[Journal] OR "J Sch Nurs"[Journal] OR "Nurs Inq"[Journal] OR "Geriatr Nurs"[Journal] OR "J Psychiatr Ment Health Nurs"[Journal] OR "Perspect Psychiatr Care"[Journal] OR "Adv Skin Wound Care"[Journal] OR "Nurs Econ"[Journal] OR "Int J Nurs Pract"[Journal] OR "Aust J Rural Health"[Journal] OR "J Spec Pediatr Nurs"[Journal] OR "J Pediatr Oncol Nurs"[Journal] OR "J Nurs Educ"[Journal] OR "J Nurs Res"[Journal] OR "MCN Am J Matern Child Nurs"[Journal] OR "J Perinat Neonatal Nurs"[Journal] OR "J Am Assoc Nurse Pract"[Journal] OR "Int J Nurs Knowl"[Journal] OR "J Contin Educ Nurs"[Journal] OR "Issues Ment Health Nurs"[Journal] OR "J Trauma Nurs"[Journal] OR "Contemp Nurse"[Journal] OR "J Gerontol Nurs"[Journal] OR "J Emerg Nurs"[Journal] OR "Public Health Nurs"[Journal] OR "J Am Psychiatr Nurses Assoc"[Journal] OR "Asian nursing research"[Journal] OR "Clin Nurse Spec"[Journal] OR "J Perianesth Nurs"[Journal] OR "AORN J"[Journal] OR "Holist Nurs Pract"[Journal] OR "Res Gerontol Nurs"[Journal] OR "J Psychosoc Nurs Ment Health Serv"[Journal] OR "Workplace Health Saf."[Journal] OR "ANS Adv Nurs Sci"[Journal] OR "J Hosp Palliat Nurs"[Journal] OR "Gastroenterol Nurs"[Journal] OR "J Neurosci Nurs"[Journal] OR "Rev Lat Am Enfermagem"[Journal] OR "Clin J Oncol Nurs"[Journal] OR "J Forensic Nurs"[Journal] OR "Nurs Clin North Am"[Journal] OR "Rev Esc Enferm USP"[Journal] OR "Jpn J Nurs Sci"[Journal] OR "Nephrol Nurs J"[Journal] OR "J Korean Acad Nurs"[Journal] OR "Nurs Sci Q"[Journal] OR "Res Theory Nurs Pract"[Journal] OR "J Nurse Pract"[Journal] OR "J Addict Nurs"[Journal] OR "Crit Care Nurs Clin North Am"[Journal] OR "Orthop Nurs"[Journal] OR "Aust J Adv Nurs"[Journal] OR "Bariatr Surg Pract Patient Care"[Journal] OR "J Community Health Nurs"[Journal] OR "Assist Infirm Ric"[Journal] OR "Pflege"[Journal])) AND (review[Title] OR meta-analysis[Title])) AND ("2011/01/01"[Date - Publication] : "2017/12/15"[Date - Publication])
