# Supplementary material for: Perception of the Preferred Reporting Items for Systematic Reviews and Meta-Analyses (PRISMA) statement of authors publishing reviews in nursing journals: a cross-sectional online survey
Source: PubMed Central journal article supplement — BMJ Open. 2019 Apr 20;9(4):e026271. doi: 10.1136/bmjopen-2018-026271 (PMC6500263; doi:10.1136/bmjopen-2018-026271), 2019-04-20
Supplement: bmjopen-2018-026271supp003.pdf [file bmjopen-2018-026271supp003.pdf]

**Supplementary file 3: Respondents' open-ended responses**

| <b>Perspective towards items related to the <i>Title</i> (Section 1)</b> |                     |                                                                                                                                                                                                                                                                                                                                                                                                                                                                                                                                                                                                                                                 |
|--------------------------------------------------------------------------|---------------------|-------------------------------------------------------------------------------------------------------------------------------------------------------------------------------------------------------------------------------------------------------------------------------------------------------------------------------------------------------------------------------------------------------------------------------------------------------------------------------------------------------------------------------------------------------------------------------------------------------------------------------------------------|
| No. of valid responses, n = 62                                           |                     |                                                                                                                                                                                                                                                                                                                                                                                                                                                                                                                                                                                                                                                 |
| <b>Categories</b>                                                        | <b>No. of codes</b> | <b>Example</b>                                                                                                                                                                                                                                                                                                                                                                                                                                                                                                                                                                                                                                  |
| Provides clear information about the study                               | 32                  | <p>“It makes the content of the paper very clear from the beginning” (Response 39)</p> <p>“essential for selecting appropriate material in search databases and provides first indication of inclusion or exclusion” (Response 18)</p>                                                                                                                                                                                                                                                                                                                                                                                                          |
| Help readers locate the work                                             | 25                  | <p>“Title needs to be explicit to help with data searching using boolean parameters” (Response 55)</p> <p>“for indexing purposes” (Response 8)</p>                                                                                                                                                                                                                                                                                                                                                                                                                                                                                              |
| Miscellaneous                                                            | 11                  | <p>“Data credence and integrity” (Response 13)</p> <p>“First thing reviewers/editors read is the title” (Response 20)</p> <p>“I am not only an author I am editor of a journal - a minority of authors continue to evidence confusion about the type of review they are doing - sometimes using systematic as an adjective rather than a noun which encapsulates a certain type of review” (Response 26)</p> <p>“Important to state as establishes understanding between author &amp; reader but not essential as it becomes clear from methods anyway” (Response 30)</p> <p>“Many articles reported in the literature are title systematic</p> |

|                                                                                                                        |                     |                                                                                                                                                                                                                                                                                                                                                                  |
|------------------------------------------------------------------------------------------------------------------------|---------------------|------------------------------------------------------------------------------------------------------------------------------------------------------------------------------------------------------------------------------------------------------------------------------------------------------------------------------------------------------------------|
|                                                                                                                        |                     | <p>reviews, but they are no more than literature reviews without a systematic process. Journal editors need to do more to ensure this term is only used for a systematic review that meet the PRISMA” (Response 43)</p> <p>“Systematic reviews carry more weight in my mind. Nice to know from the beginning whether the review is systematic” (Response 53)</p> |
| <p><b>Perspective towards items related to the <i>Abstract</i> (Section 2)</b><br/> No. of valid responses, n = 62</p> |                     |                                                                                                                                                                                                                                                                                                                                                                  |
| <b>Categories</b>                                                                                                      | <b>No. of codes</b> | <b>Example</b>                                                                                                                                                                                                                                                                                                                                                   |
| Helps readers quickly ascertain the purpose of the paper                                                               | 28                  | <p>“A clear abstract helps a user rapidly determine if they need to refer to the document at all” (Response 1)</p> <p>“Allows the reader to determine relevance of the research to thier priorities” (Response 7)</p>                                                                                                                                            |
| Standardises reporting of research                                                                                     | 8                   | <p>“A structured reporting ensures methodological rigor &amp; standardizes reporting--this way important items aren't overlooked” (Response 2)</p> <p>“Having an organized method of reporting data improves the public’s understanding of what they are reading” (Response 22)</p>                                                                              |
| Summarises the key content of the systematic review                                                                    | 8                   | <p>“Succinctly recaps key elements and findings of research article” (Response 43)</p> <p>“Data display matrix- similarity and differences are evident” (Response 16)</p>                                                                                                                                                                                        |

|                                                                                 |                     |                                                                                                                                                                                                                                                                                                                                                                                                      |
|---------------------------------------------------------------------------------|---------------------|------------------------------------------------------------------------------------------------------------------------------------------------------------------------------------------------------------------------------------------------------------------------------------------------------------------------------------------------------------------------------------------------------|
| Necessary component of systematic review reporting                              | 5                   | “Essential for all publications - often the only part read so must include essential components” (Response 18)                                                                                                                                                                                                                                                                                       |
| Not necessary to provide systematic review registration number in abstract      | 4                   | “not always necessary to register the systematic review. Not all systematic reviews are registered” (Response 37)                                                                                                                                                                                                                                                                                    |
| Limitations of abstracts                                                        | 2                   | “I’m in favour of a structured abstract but the word limits of such is prohibitive to cover all aspects.” (Response 8)                                                                                                                                                                                                                                                                               |
| <b>Perspective towards items related to the <i>Introduction</i> (Section 3)</b> |                     |                                                                                                                                                                                                                                                                                                                                                                                                      |
| No. of valid responses, n = 62                                                  |                     |                                                                                                                                                                                                                                                                                                                                                                                                      |
| <b>Categories</b>                                                               | <b>No. of codes</b> | <b>Example</b>                                                                                                                                                                                                                                                                                                                                                                                       |
| Introduces readers about the context                                            | 12                  | “Provides history, background, significance, and lays the foundation for the purpose of the review” (Response 34)<br><br>“aids in logical presentation and helps the reader” (Response 1)                                                                                                                                                                                                            |
| Limitations and inflexibility of PICO                                           | 12                  | “I find the PICO format to be cumbersome in the development of the research question. It is useful as a new scientist but perhaps less necessary for more experienced researchers.” (Response 19)<br><br>“I believe that could be interesting a new approach or a dismemberment of the PICOS question since revision studies do not always refer to intervention studies, for example” (Response 18) |
| Frames the research questions                                                   | 10                  | “The reader needs a problem statement and background information to compare with the study results and decide where they fit in overall with what is known.” (Response 42)<br><br>“Clarity on the gap and the question provides the                                                                                                                                                                  |

|                                                                            |                     |                                                                                                                                                                                                                                                                                                                                                                                                                                                                                                                                                                                      |
|----------------------------------------------------------------------------|---------------------|--------------------------------------------------------------------------------------------------------------------------------------------------------------------------------------------------------------------------------------------------------------------------------------------------------------------------------------------------------------------------------------------------------------------------------------------------------------------------------------------------------------------------------------------------------------------------------------|
|                                                                            |                     | foundation for the work” (Response 10)                                                                                                                                                                                                                                                                                                                                                                                                                                                                                                                                               |
| Provides clarity                                                           | 7                   | “Precision and transparency” (Response 33)                                                                                                                                                                                                                                                                                                                                                                                                                                                                                                                                           |
| Reduces duplication of research through description of research gaps       | 3                   | “In some disciplines there is a plethora of systematic reviews conducted on the same topic in a very short time frame. A strong rationale for why a review is being conducted is important” (Response 22)                                                                                                                                                                                                                                                                                                                                                                            |
| Essential information in reporting research                                | 3                   | “Part and parcel of sound research” (Response 28)                                                                                                                                                                                                                                                                                                                                                                                                                                                                                                                                    |
| Miscellaneous                                                              | 6                   | <p>“In an era of evidence-based medicine/practice anything other than a systematic review process is of little value to the reader” (Response 21)</p> <p>“Systematic reviews are being used as 'citation generators' - the rationale shows if the SR is actually needed - purpose of the review may actually be scant because their motivation is to select a topic that will generate citations” (Response 39)</p> <p>“These issues are too often superficially described and weak performance in nursing” (Response 46)</p> <p>“Transparency is important in SR” (Response 47)</p> |
| <b>Perspective towards items related to the <i>Methods</i> (Section 4)</b> |                     |                                                                                                                                                                                                                                                                                                                                                                                                                                                                                                                                                                                      |
| No. of valid responses, n = 62                                             |                     |                                                                                                                                                                                                                                                                                                                                                                                                                                                                                                                                                                                      |
| <b>Categories</b>                                                          | <b>No. of codes</b> | <b>Example</b>                                                                                                                                                                                                                                                                                                                                                                                                                                                                                                                                                                       |
| Ensures quality, rigor and trustworthiness                                 | 17                  | <p>“These items are essential to assuring the internal validity of the review” (Response 38)</p> <p>“All tried and tested methods of ensuring quality and</p>                                                                                                                                                                                                                                                                                                                                                                                                                        |

|                                                                       |   |                                                                                                                                                                                                                                                                                                                                                                                                                                                                                                                                              |
|-----------------------------------------------------------------------|---|----------------------------------------------------------------------------------------------------------------------------------------------------------------------------------------------------------------------------------------------------------------------------------------------------------------------------------------------------------------------------------------------------------------------------------------------------------------------------------------------------------------------------------------------|
|                                                                       |   | avoiding bias” (Response 5)                                                                                                                                                                                                                                                                                                                                                                                                                                                                                                                  |
| Allows replication of systematic review                               | 9 | “Reporting of methods to allow for transparency and reproducibly is very important in a systematic review” (Response 26)                                                                                                                                                                                                                                                                                                                                                                                                                     |
| Essential component of reporting research                             | 8 | “A systematic review is often regarded as research of research - all of the above are components of a well-developed research study and are applicable to systematic reviews as well.” (Response 1)                                                                                                                                                                                                                                                                                                                                          |
| Not all items are necessary for different types of systematic reviews | 5 | “I think the assessment of risk of bias, statement of risk ratio and explaining additional analyses depend on the study design. If I conduct e.g. a systematic review of cross-sectional surveys or a meta-synthesis I do not need this information.” (Response 13)                                                                                                                                                                                                                                                                          |
| Differentiates the good reviews from the bad                          | 2 | “Important for the reader to be able to evaluate the quality of the review” (Response 15)                                                                                                                                                                                                                                                                                                                                                                                                                                                    |
| Miscellaneous                                                         | 9 | <p>“These helps identify the rigour - a systematic review can look superficially good, but if items 9,10,11, 14 are vague, then it shows the authors have not recognised the subjective component in the review process - thus it is weaker” (Response 36)</p> <p>“item 12 - assessment of bias is crucial, however, limitations of the tools used to assess the risk of bias should be understood” (Response 18)</p> <p>“SR protocols are not always published - time constraints, e.g. for Masters or PhD students undertaking a SR or</p> |

|                                                                                                                       |                     |                                                                                                                                                                                                                                                                                                                                                  |
|-----------------------------------------------------------------------------------------------------------------------|---------------------|--------------------------------------------------------------------------------------------------------------------------------------------------------------------------------------------------------------------------------------------------------------------------------------------------------------------------------------------------|
|                                                                                                                       |                     | <p>where the SR is part of a time-constrained funded study, can be the limiting factor. Some journals do not review protocols quickly.” (Response 28)</p> <p>“heterogeneity need to be explored” (Response 12)</p>                                                                                                                               |
| <p><b>Perspective towards items related to the <i>Results</i> (Section 5)</b><br/> No. of valid responses, n = 62</p> |                     |                                                                                                                                                                                                                                                                                                                                                  |
| <b>Categories</b>                                                                                                     | <b>No. of codes</b> | <b>Example</b>                                                                                                                                                                                                                                                                                                                                   |
| Important component in research reporting                                                                             | 11                  | <p>“All of the above are components of a well-designed research study and are applicable to systematic reviews as well” (Response 7)</p> <p>“These are all essential elements of rigor in SR” (Response 30)</p>                                                                                                                                  |
| Not all criteria of Results are necessary to report                                                                   | 9                   | <p>“Not always feasible, in a publication, to include all the details - especially if different for each publication and/or high number of studies in review” (Response 19)</p> <p>“See 14b, the items does not cover very well these types of reviews, where a narrative synthesis is the only option to present the results” (Response 24)</p> |
| Not all details can be presented                                                                                      | 6                   | <p>“I believe that if we think in terms of publication of the review we have a certain number of words and tables and that in general for the detailed description of each study, which is descriptive or meta-analysis may not be possible.” (Response 5)</p>                                                                                   |
| Necessary for rigor and trustworthiness                                                                               | 5                   | <p>“These items demonstrate the rigour of data collection and assure the reader that the results can be trusted.” (Response</p>                                                                                                                                                                                                                  |

|                                                                                                                 |                     |                                                                                                                                                                                                                                                       |
|-----------------------------------------------------------------------------------------------------------------|---------------------|-------------------------------------------------------------------------------------------------------------------------------------------------------------------------------------------------------------------------------------------------------|
|                                                                                                                 |                     | 31)                                                                                                                                                                                                                                                   |
| Miscellaneous                                                                                                   | 5                   | “heterogeneity need to be explored” (Response 14)<br>“Precision” (Response 21)                                                                                                                                                                        |
| <b>Perspective towards items related to the <i>Discussion</i> (Section 6)</b><br>No. of valid responses, n = 62 |                     |                                                                                                                                                                                                                                                       |
| <b>Categories</b>                                                                                               | <b>No. of codes</b> | <b>Example</b>                                                                                                                                                                                                                                        |
| Informs knowledge gaps, future practice and implications                                                        | 14                  | “Important because it places into context, the findings and helps users of the information identify how it relates to their practice.” (Response 13)<br><br>“this section is the translational piece and what gives the evidence power” (Response 26) |
| An essential component of reporting research                                                                    | 9                   | “An essential component of reporting research” (Response 19)<br>“This is not specific to systematic reviews but to all research reported on - Prisma should focus on systematic review specifics” (Response 25)                                       |
| Shortfalls of the discussion in some systematic reviews                                                         | 3                   | “Discussion sometimes simply repeats the results data and weakens the discussion section if not supported with other literature” (Response 8)                                                                                                         |
| Provides overall results                                                                                        | 2                   | “Discussion includes overall results” (Response 7)                                                                                                                                                                                                    |
| Discussion may not be as important as the rigour of the systematic review                                       | 2                   | “I prefer to let the results 'speak for themselves' so while I find interpretation (Item 26) useful I see it as a colleague opinion but the responsibility is on me to interpret what they present - hence the need for transparency and              |

|                                                                            |                     |                                                                                                                                                                                                                                                                                          |
|----------------------------------------------------------------------------|---------------------|------------------------------------------------------------------------------------------------------------------------------------------------------------------------------------------------------------------------------------------------------------------------------------------|
|                                                                            |                     | demonstration of rigour” (Response 11)                                                                                                                                                                                                                                                   |
| Part of evidence appraisal                                                 | 1                   | “All of the above items are components of evidence appraisal and must be conducted in a detailed and rigorous manner” (Response 3)                                                                                                                                                       |
| <b>Perspective towards items related to the <i>Funding</i> (Section 7)</b> |                     |                                                                                                                                                                                                                                                                                          |
| No. of valid responses, n = 62                                             |                     |                                                                                                                                                                                                                                                                                          |
| <b>Categories</b>                                                          | <b>No. of codes</b> | <b>Example</b>                                                                                                                                                                                                                                                                           |
| Reveals potential for bias                                                 | 10                  | “To indicate to the reader the possibility of external influence to the study findings” (Response 24)<br><br>“To make clear any conflicts of interest and how these have either impacted on the study, been eliminated or have not had any influence on the study outcome” (Response 25) |
| Allows declaration of conflict of interests                                | 9                   | “Conflicts of interest need to be announced” (Response 8)<br><br>“identify any perceived or real conflict of interest” (Response 14)                                                                                                                                                     |
| Allows transparency                                                        | 5                   | “In general, all these questions should be rated 10, due to a requirement for a transparent, accurate and systematic approach in systematic reviews.” (Response 16)                                                                                                                      |
| Necessary component                                                        | 4                   | “Required for all research published/reports” (Response 20)                                                                                                                                                                                                                              |
| Miscellaneous                                                              | 3                   | “none of the studies I have done required any funding” (Response 19)                                                                                                                                                                                                                     |



|  |  |                                                                                                                                         |
|--|--|-----------------------------------------------------------------------------------------------------------------------------------------|
|  |  | “Unless the risk of bias is caused by external funding, there should never be such risk as there is no new data added”<br>(Response 27) |
|--|--|-----------------------------------------------------------------------------------------------------------------------------------------|
